# Supplementary material for: Iron nanoparticles in capsules: derived from mesoporous silica-protected Prussian blue microcubes for efficient selenium removal
Source: Royal Society of Chemistry journal article supplement (doi:10.1039/c8cc03066a), 2018-01-01
Supplement: c8cc03066a1.pdf [file c8cc03066a1.pdf]

## Supporting Information

# **Iron Nanoparticles in Capsules: Derived from Mesoporous Silica-Protected Prussian Blue Microcubes as Efficient Selenium Removal**

Qingqing Wang,<sup>a</sup> Yuye Zhao,<sup>a</sup> Wei Luo,<sup>a</sup> Weizhong Jiang,<sup>a</sup> Jianwei Fan,<sup>b</sup> Lianjun Wang,<sup>a</sup> Wan Jiang,<sup>a</sup> Wei-xian Zhang<sup>b</sup> and Jianping Yang<sup>\*a</sup>

<sup>a</sup>Key Laboratory of High Performance Fibers & Products, Ministry of Education, State Key Laboratory for Modification of Chemical Fibers and Polymer Materials, College of Materials Science and Engineering, Donghua University, Shanghai 201620, China. Email: jianpingyang@dhu.edu.cn; Tel: +86-21-67874091

<sup>b</sup>College of Environmental Science and Engineering, State Key Laboratory of Pollution Control and Resource Reuse, Tongji University, Shanghai 200092, China

## **1. Experimental section**

### **1.1 Materials**

Potassium hexacyanoferrate (II) trihydrate ( $K_4Fe(CN)_6 \cdot 3H_2O$ ), polyvinylpyrrolidone (PVP), hydrochloric acid (HCl) were obtained from Sinopharm Chemical Reagent Co., Ltd. Tetraethyl orthosilicate (TEOS), cetyltrimethylammonium chloride (CTAC), ammonia aqueous solution (28 wt.%), sodium selenite ( $Na_2SeO_3$ ) and triethanolamine (TEA) were purchased from Sigma-Aldrich (UK). Deionized water was used to prepare all solutions used in this study.

### **1.2 Methods**

#### **1.2.1 Synthesis of Prussian blue microcubes**

Prussian blue microcubes with an edge length of 450 nm were prepared according to the previous report with a minor modification by Zhang et al.<sup>1</sup> Briefly, 22.8 g of PVP and 0.66 g of  $K_4Fe(CN)_6 \cdot 3H_2O$  were dissolved in a 200 mL of aqueous solution containing 0.1 M of HCl under magnetic stirring. After stirring for 60 min, a clear solution was obtained and placed into an electric oven under 80 °C for 24 h. The obtained blue product was collected by centrifugation and washed several times with distilled water and absolute ethanol. Finally dried the products in a vacuum oven at 60 °C overnight.

#### **1.2.2 Synthesis of PB@mSiO<sub>2</sub> core-shell micro-boxes**

The dendritic mesoporous silica with thickness of 20 nm was coated on the surface of the PB microcubes through an oil-water biphasic stratification approach.<sup>2</sup> For a typical preparation procedure, a mixture solution containing 0.25 g of PB microcubes, 60 mL of H<sub>2</sub>O, 6 g CTAC and 0.18 mL of TEA were added into a 100-mL round bottom flask and stirred for 1 h at 60 °C. Then 20 mL of TEOS (20 v/v % in cyclohexane) was gently dropped. The reaction was maintained at 60 °C for 12 h in an oil bath with reflux under magnetic stirring (70 rpm). The products were collected after removal of the upper oil layer, then centrifuged and washed with ethanol and water for several cycles.

#### **1.2.3 Preparation of Fe/C@mSiO<sub>2</sub> core-shell capsules**

The core-shell Fe/C@mSiO<sub>2</sub> capsule was obtained by calcination and reduction of the PB@mSiO<sub>2</sub> powder at 400-600 °C for 3 h under H<sub>2</sub> atmosphere. A series of products calcined at different temperatures are named as Fe/C@mSiO<sub>2</sub>-400, Fe/C@mSiO<sub>2</sub>-500 and Fe/C@mSiO<sub>2</sub>-600 according to the calcination temperature of 400, 500 and 600 °C, respectively.

#### **1.2.4 Heavy metal extraction from water**

Batch experiments were conducted in a series of 50 mL three-neck flask, with 40-200 mg/L Fe/C@mSiO<sub>2</sub> capsule added to 35 mL of 5-135 mg/L Se (IV) solution. Each reactor had three ports, one for a mechanical stirrer, one for high-purity nitrogen (N<sub>2</sub>, >99.9%) gas purging and the last one for adding and retrieving solutions. To eliminate dissolved oxygen, the Se (IV) solution was purged with high-purity N<sub>2</sub> for 30 min before the addition of Fe/C@mSiO<sub>2</sub> capsule. The initial pH was adjusted to 7.0. After 3 hours, the mixed solution was separated by centrifuging and magnetic separation. The supernatant was analyzed by using an inductively coupled plasma spectrometer (ICP) to detect the ionic metal contents of heavy metals and iron, and the slurry was dried in

air for material characterization. The comparison experiments between nZVI particles and Fe/C@mSiO<sub>2</sub> capsule for Se (IV) removal at the same environment were conducted at the Se (IV) concentration of 35 mg/L, with a contact time of 3 h.

### 1.3 Characterizations

The morphologies and dispersity of the samples were observed by scanning electron microscopy (Hitachi S-4800, Japan). The TEM images were taken using a JEM-2100F transmission electron microscope (JEOL, Japan). The phase of the samples was characterized by X-ray diffraction (XRD) using a Rigaku D/Max-2550 PC diffractometer (Tokyo, Japan) equipped with CuK $\alpha$  radiation. Thermal gravimetric analysis (TGA) was carried out on a Q5000IR TG-DTA instrument with a heating rate of 10 °C min<sup>-1</sup> under air atmosphere. Nitrogen adsorption-desorption isotherms were tested at 77 K with a Micromeritics Tristar 3020 analyzer. The samples were degassed under vacuum at 180 °C for at least 6 h before measurements. The specific surface areas were calculated using the Brunauer-Emmett-Teller (BET) method. The pore volumes and pore size distributions were obtained by using the Barrett-Joyner-Halenda (BJH) model from the adsorption branches of isotherms. The total pore volumes (V) were evaluated according to the adsorbed amount at a relative pressure P/P<sub>0</sub> of 0.995. Raman spectra were performed on Via-Reflex via Raman spectroscopy.

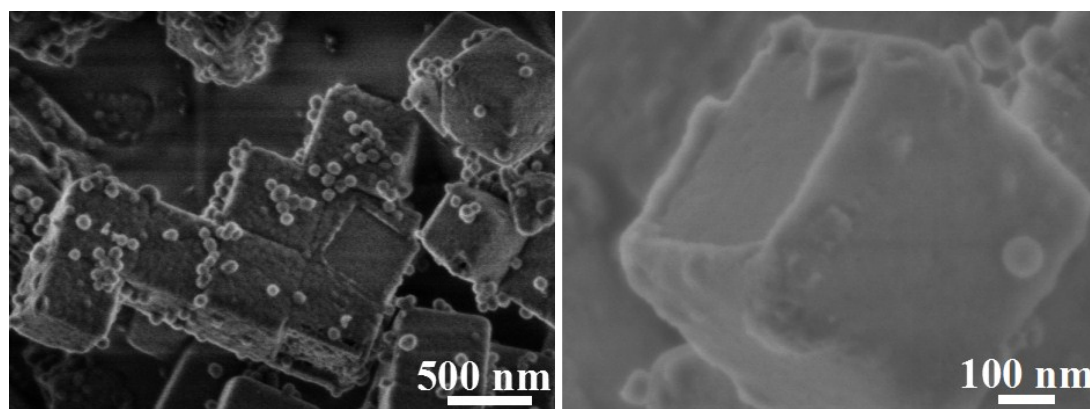

**Fig. S1** SEM images of PB@mSiO<sub>2</sub> core-shell structured micro-boxes, prepared by oil-water biphasic stratification approach.

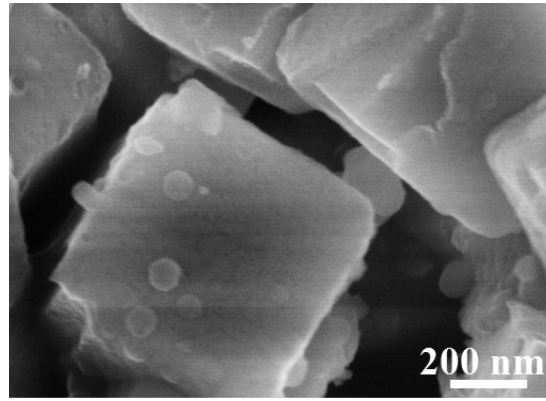

**Fig. S2** SEM image of Fe/C@mSiO<sub>2</sub> core-shell structured capsules with radially oriented mesopores, calcined at 500 °C for 3 h under H<sub>2</sub> atmosphere.

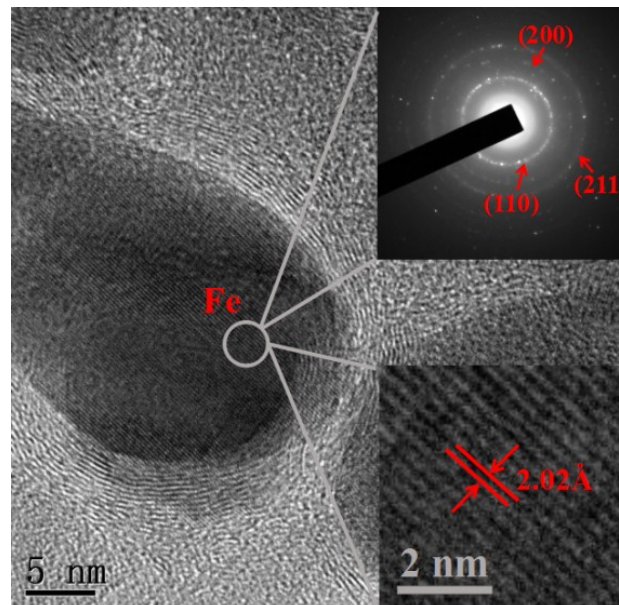

**Fig. S3** High-resolution TEM images with the corresponding SAED pattern (inset) for Fe/C@mSiO<sub>2</sub> core-shell structured capsules.

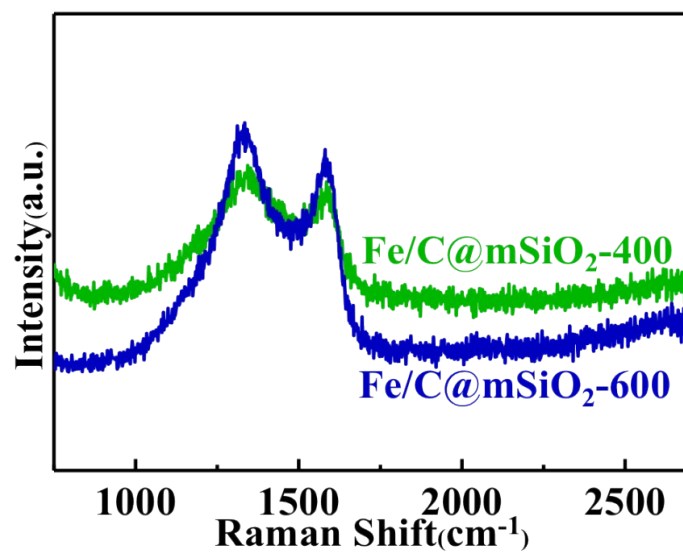

**Fig. S4** Raman spectra of Fe/C@mSiO<sub>2</sub>-400 and Fe/C@mSiO<sub>2</sub>-600 samples.

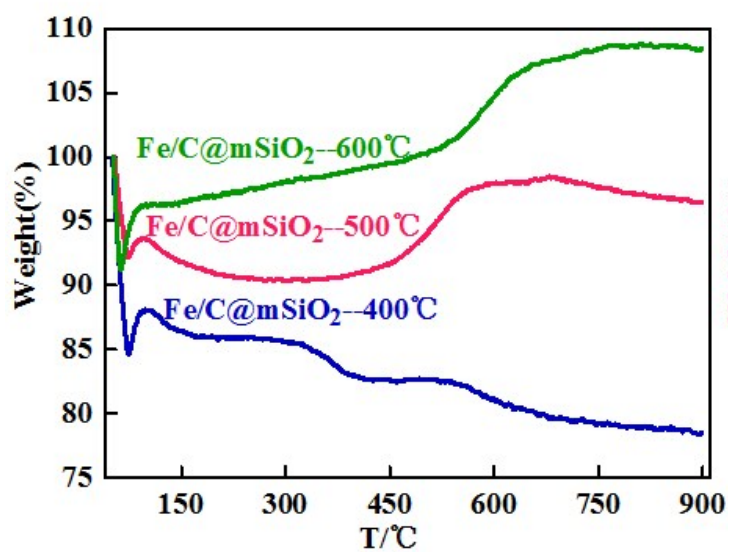

**Fig. S5** TGA plots of Fe/C@mSiO<sub>2</sub>-400, Fe/C@mSiO<sub>2</sub>-500 and Fe/C@mSiO<sub>2</sub>-600 samples.

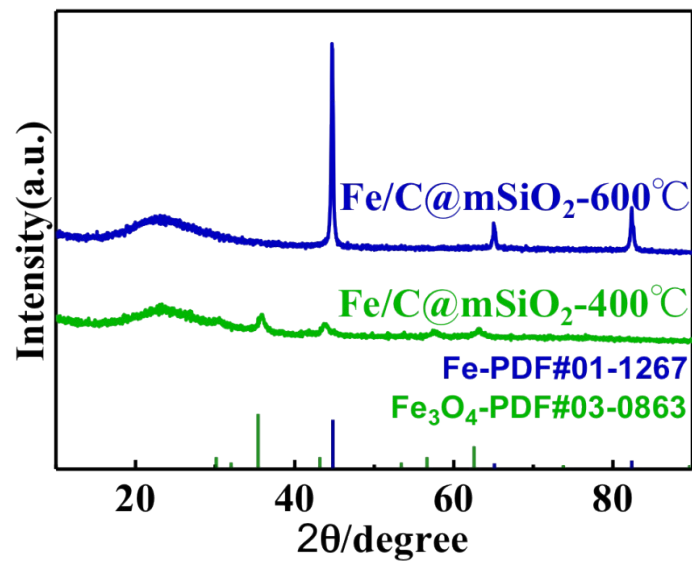

**Fig. S6** XRD patterns of Fe/C@mSiO<sub>2</sub>-400 and Fe/C@mSiO<sub>2</sub>-600 samples, which are reduced at 400 and 600 °C for 3 h under H<sub>2</sub> atmosphere.

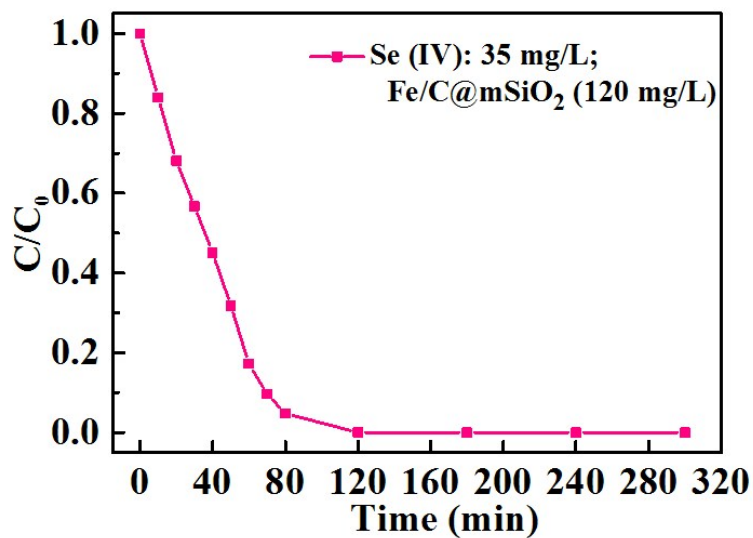

**Fig. S7** The kinetic of Se (IV) removal with the Fe/C@mSiO<sub>2</sub> core-shell structured capsules.

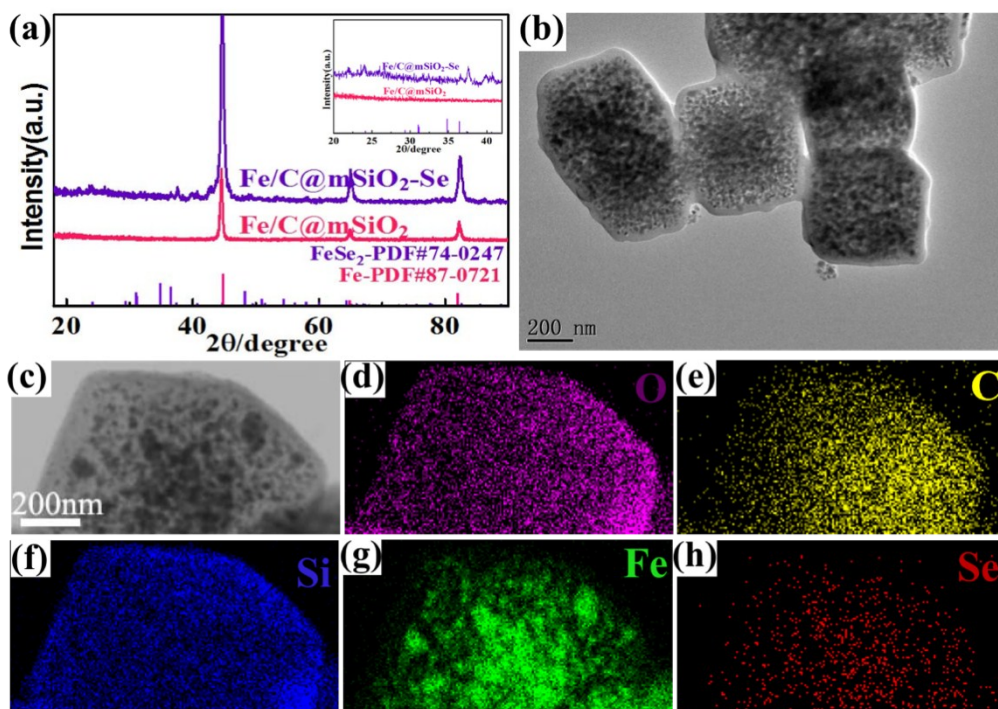

**Fig. S8** (a) XRD patterns and (b) TEM of Fe/C@mSiO<sub>2</sub>-Se capsules after removal of Se; (c) STEM, and (d-h) EDX elemental mapping of Fe/C@mSiO<sub>2</sub>-Se for Si, O, Fe, C and Se.

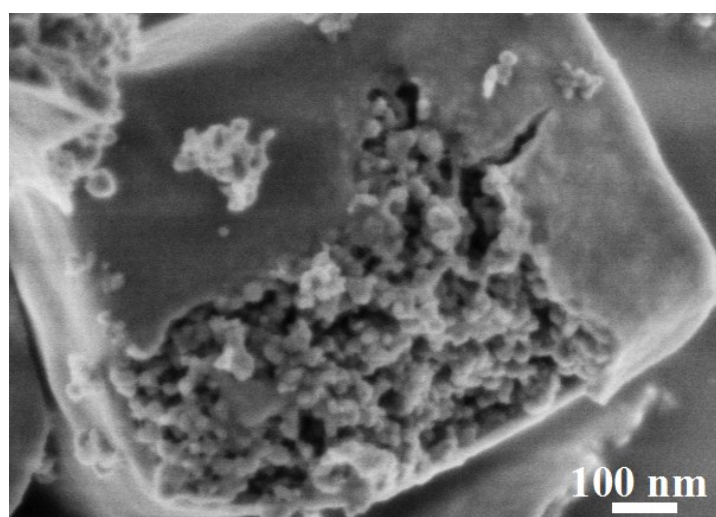

**Fig. S9** SEM image of Fe/C@mSiO<sub>2</sub>-Se after removing Se from low concentration aqueous solution. It can be found that the Se with uniformly small nanoparticles are capped in the Fe/C@mSiO<sub>2</sub> core-shell structures from a broken capsule.

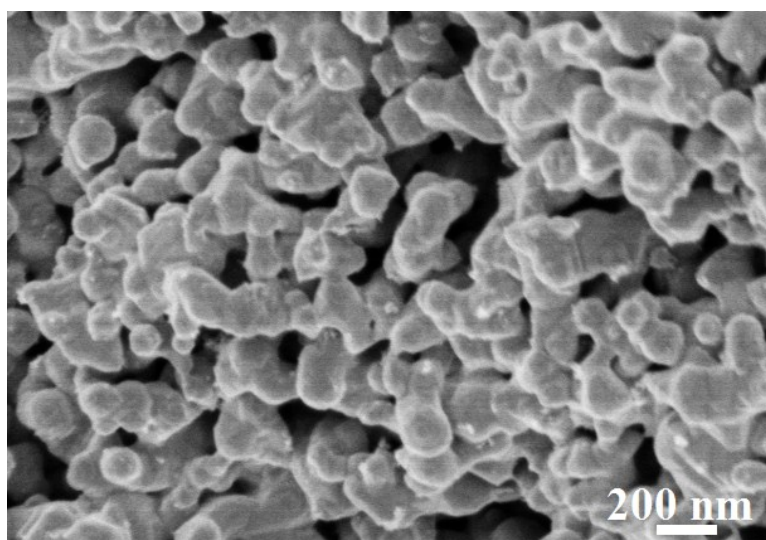

**Fig. S10** SEM image of compared nanoscale zero-valent iron (nZVI) particles. It can be observed that the nZVI particles are seriously aggregated.

**Table S1** Summary of different samples for the removal of Se(IV).

| Sample                                              | Carrier                  | Synthesis method                               | Dosage of sample | Actual content of Fe <sup>0</sup> | Initial concentration of Se(IV) | Removal rate of Se(IV) | Ref       |
|-----------------------------------------------------|--------------------------|------------------------------------------------|------------------|-----------------------------------|---------------------------------|------------------------|-----------|
| <b>nZVI</b>                                         | none                     | chemical reduction                             | 500 mg/L         | 500 mg/L                          | 100 mg/L                        | 99% for 3h             | [3]       |
| <b>magnetic graphene oxide (MGO)</b>                | graphene oxide           | Hummers method                                 | 1 g/L            | 1 g/L                             | 300 mg/L                        | 80% for 24h            | [4]       |
| <b>dendrimer functionalized graphene oxide</b>      | graphene oxide           | poly(amid-oamine)functionalized graphene oxide | 200 mg/L         | 200 mg/L                          | 80 mg/L                         | 37.5% for 24h          | [5]       |
| <b>thin-film composite nanofiltration membranes</b> | nanofiltration membranes | co-polymer P(MPC-co-AEMA) modified membranes   | /                | /                                 | 350 mg/L                        | 98.2%                  | [6]       |
| <b>nanoparticles sol (NanoFe)</b>                   | none                     | sol-gel method                                 | 120 mg/L         | 120 mg/L                          | 12 mg/L                         | 95% for 3h             | [7]       |
| <b>Fe/C@mSiO<sub>2</sub></b>                        | C-mSiO <sub>2</sub>      | spatially confined reduction                   | 120 mg/L         | 40 mg/L                           | 35 mg/L                         | 99.9% for 3h           | This work |



## Reference

1. L. Zhang, H. B. Wu, S. Madhavi, H. H. Hng and X. W. Lou, *J. Am. Chem. Soc.*, 2012, **134**, 17388-17391.
2. J. Yang, D. Shen, Y. Wei, W. Li, F. Zhang, B. Kong, S. Zhang, W. Teng, J. Fan, W. Zhang, S. Dou and D. Zhao, *Nano Res.*, 2015, **8**, 2503-2514.
3. X. Xia, L. Ling and W. X. Zhang, *Chemosphere*, 2017, **168**, 1597-1603.
4. Y. Fu, J. Wang, Q. Liu and H. Zeng, *Carbon*, 2014, **77**, 710-721.
5. W. Xiao, B. Yan, H. Zeng and Q. Liu, *Carbon*, 2016, **105**, 655-664.
6. Y. He, J. Liu, G. Han and T.-S. Chung, *J. Membrane Sci.*, 2018, **555**, 299-306.
7. Zelmanov and R. Semiat, *Sep. Purif. Technol.*, 2013, **103**, 167-172.
